# Supplementary material for: Development of New Benzylpiperazine Derivatives as σ1 Receptor Ligands with in Vivo Antinociceptive and Anti-Allodynic Effects
Source: PubMed Central journal article supplement (PMC8291485; doi:10.1021/acschemneuro.1c00106), 2021-05-21
Supplement: cn1c00106_si_001.pdf [file cn1c00106_si_001.pdf]

# Supporting Information

## Development of New Benzylpiperazine Derivatives as $\sigma_1$ Receptor Ligands with *in Vivo* Antinociceptive and Anti-Allodynic Effects

Giuseppe Romeo,<sup>†</sup> Federica Bonanno,<sup>†</sup> Lisa L. Wilson,<sup>‡</sup> Emanuela Arena,<sup>†</sup> Maria N. Modica,<sup>†</sup> Valeria Pittalà,<sup>†</sup> Loredana Salerno,<sup>†</sup> Orazio Prezzavento,<sup>†</sup> Jay P. McLaughlin,<sup>‡</sup> and Sebastiano Intagliata<sup>\*†</sup>

<sup>†</sup>Department of Drug and Health Sciences, University of Catania, viale A. Doria 6, 95125 Catania, Italy

<sup>‡</sup>Department of Pharmacodynamics, College of Pharmacy, University of Florida, Gainesville, Florida 32610, United States

\*Phone: +39-095-738-4053. Email: s.intagliata@unict.it.

### Contents:

|                                                                                                                                                |           |
|------------------------------------------------------------------------------------------------------------------------------------------------|-----------|
| <b>Figures S1–S18:</b> <sup>1</sup> H NMR and <sup>13</sup> C NMR spectra of compounds <b>13–16</b> , <b>20–22</b> , <b>23</b> , and <b>24</b> | p. S2–S10 |
|------------------------------------------------------------------------------------------------------------------------------------------------|-----------|

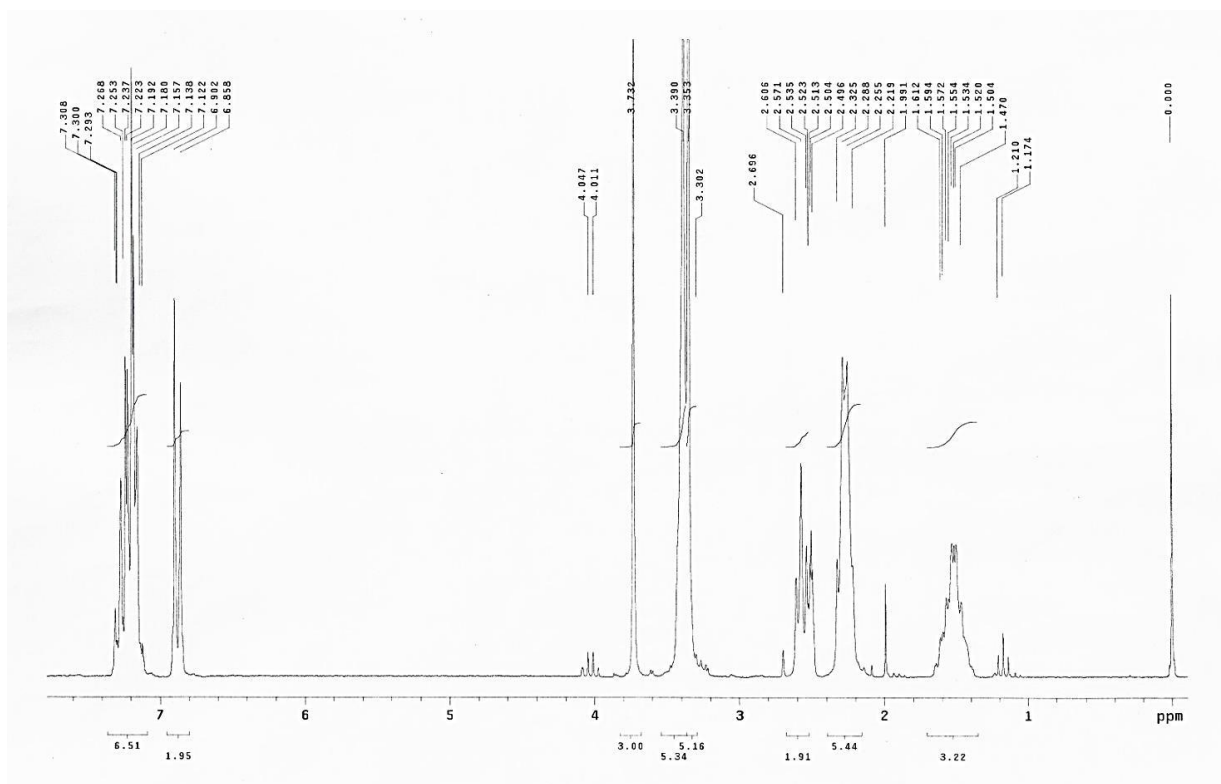

**Figure S1.**  $^1\text{H}$  NMR spectrum of compound **13**

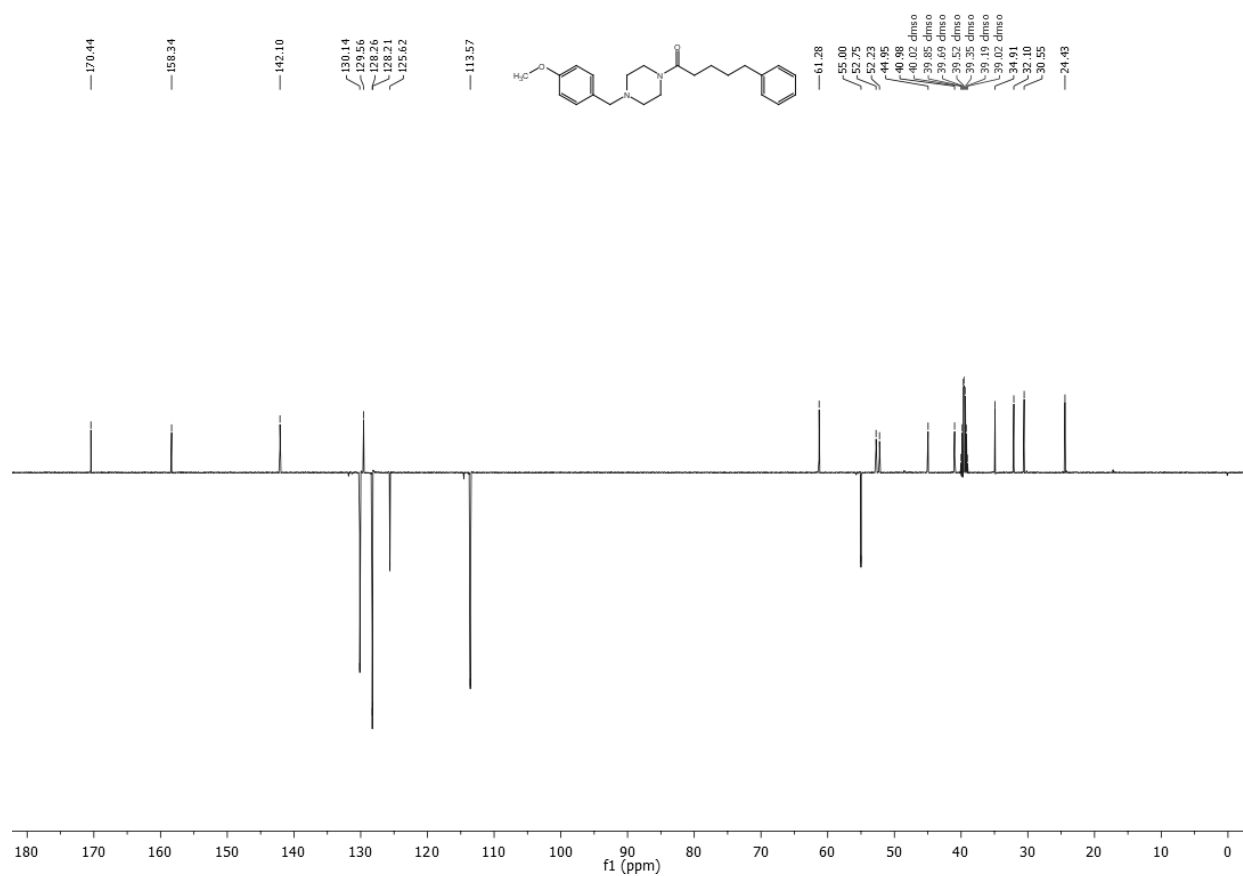

**Figure S2.**  $^{13}\text{C}$  NMR spectrum of compound **13**

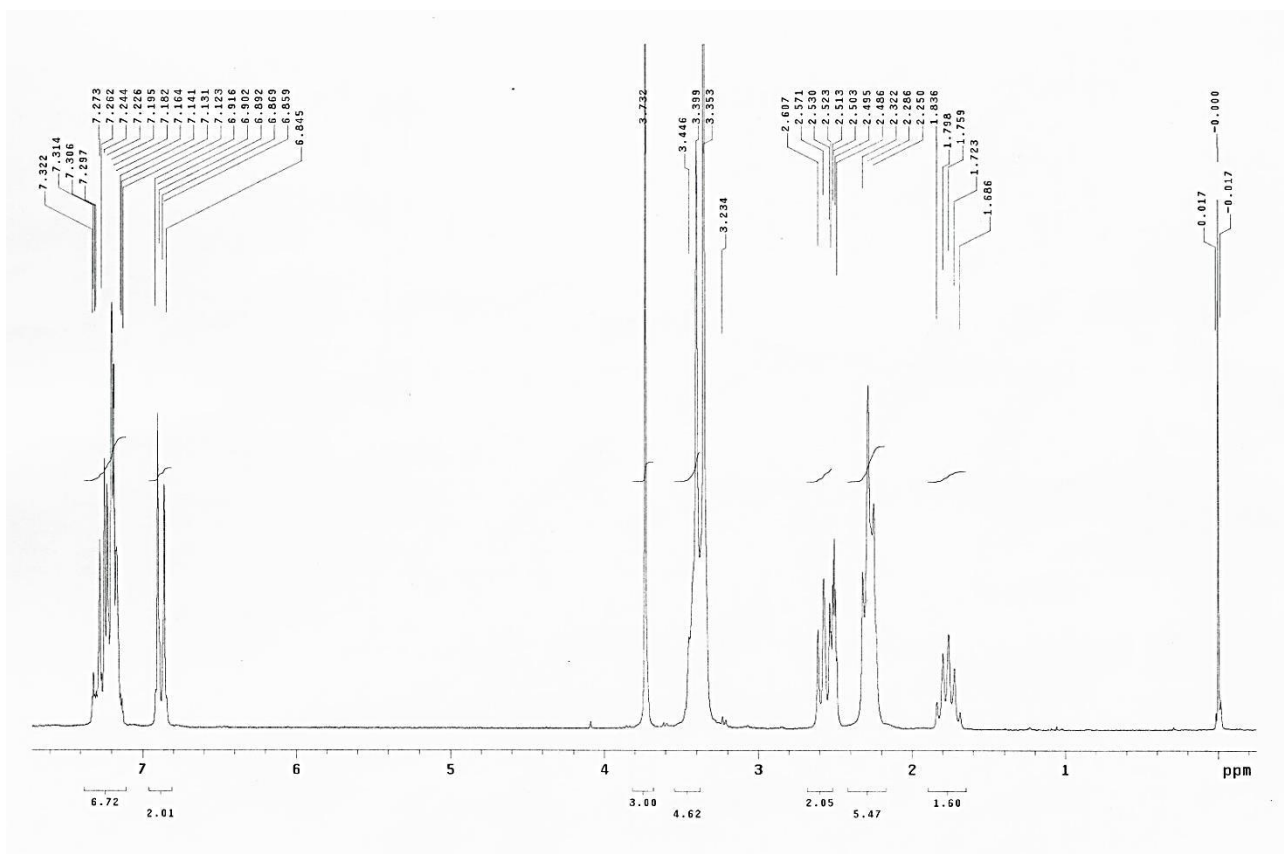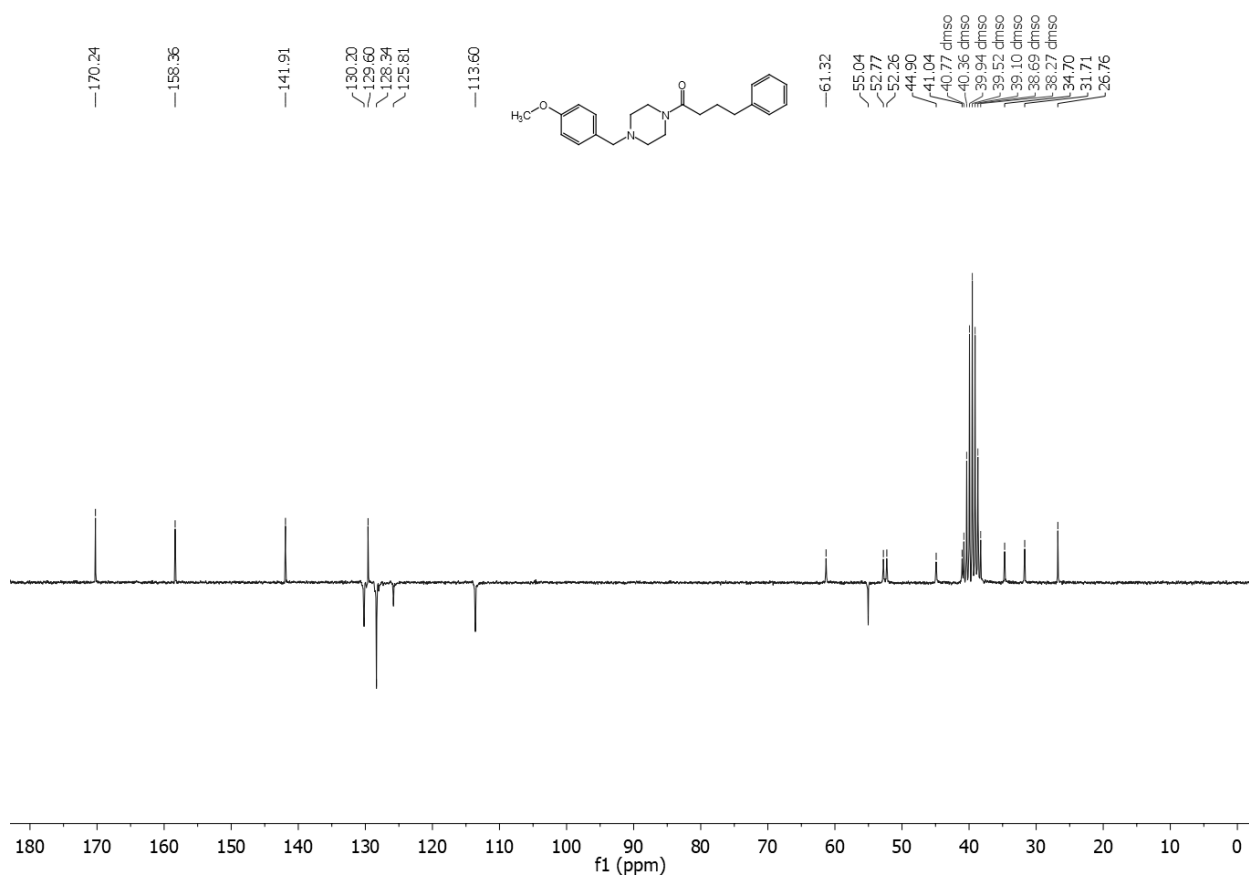

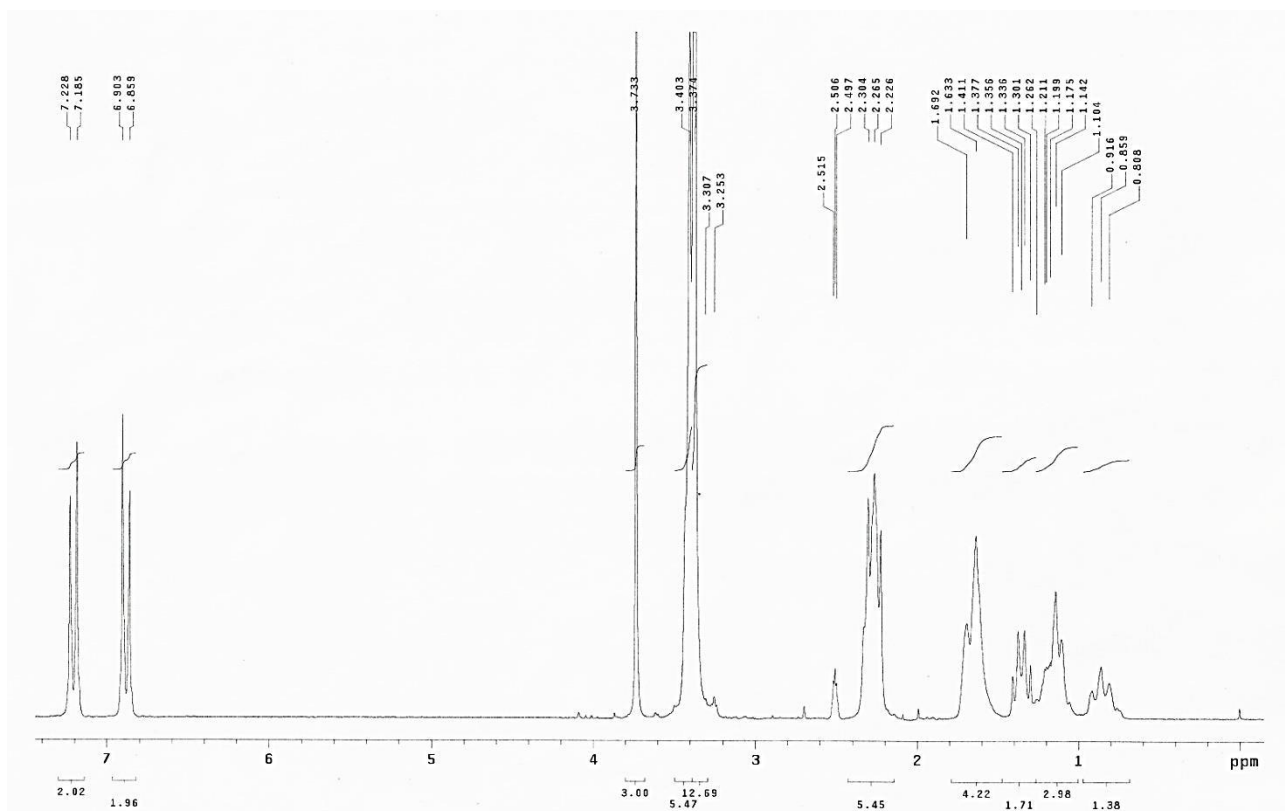

**Figure S5.**  $^1\text{H}$  NMR spectrum of compound **15** (free base)

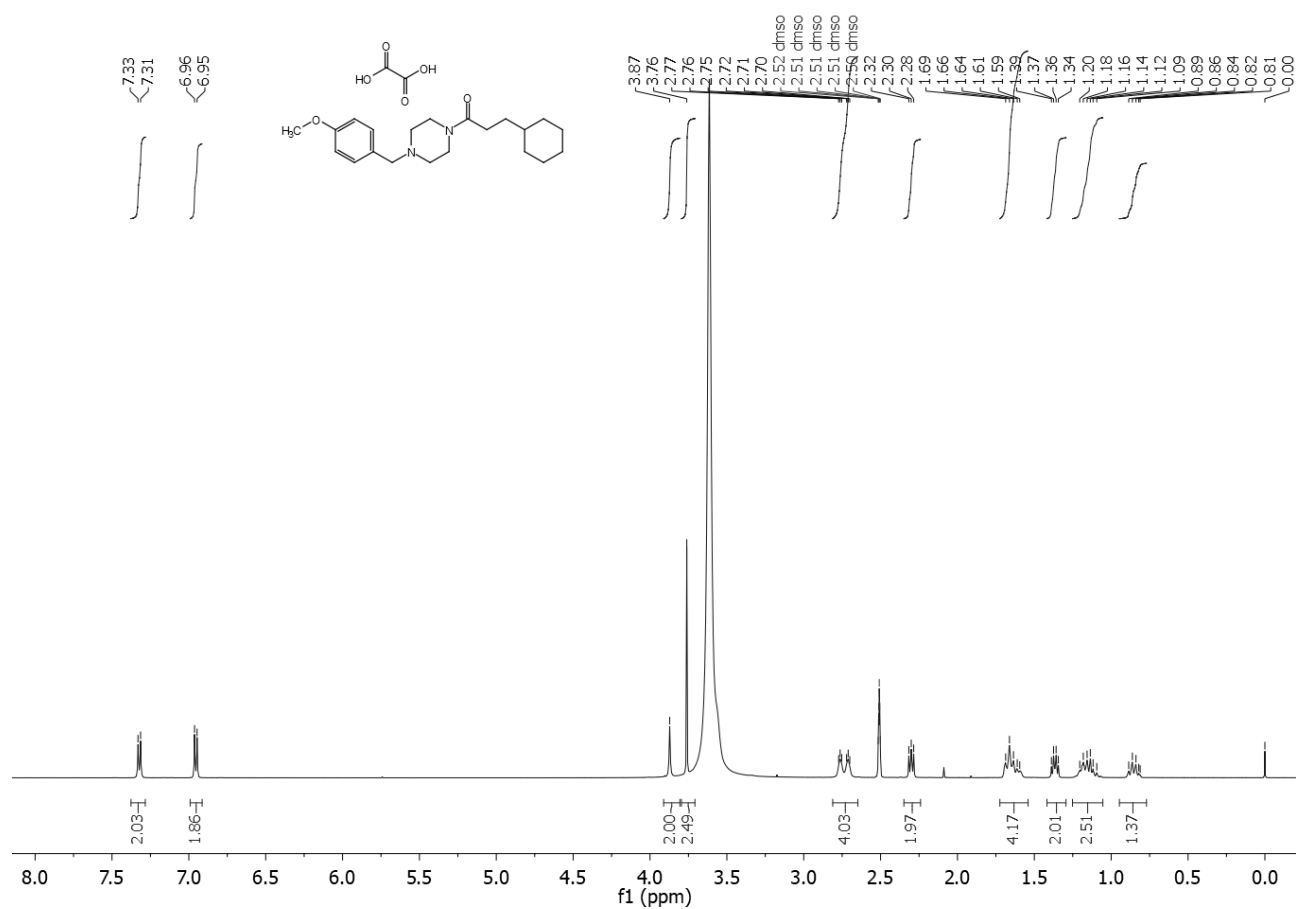

**Figure S6.**  $^1\text{H}$  NMR spectrum of compound **15** (oxalate salt)

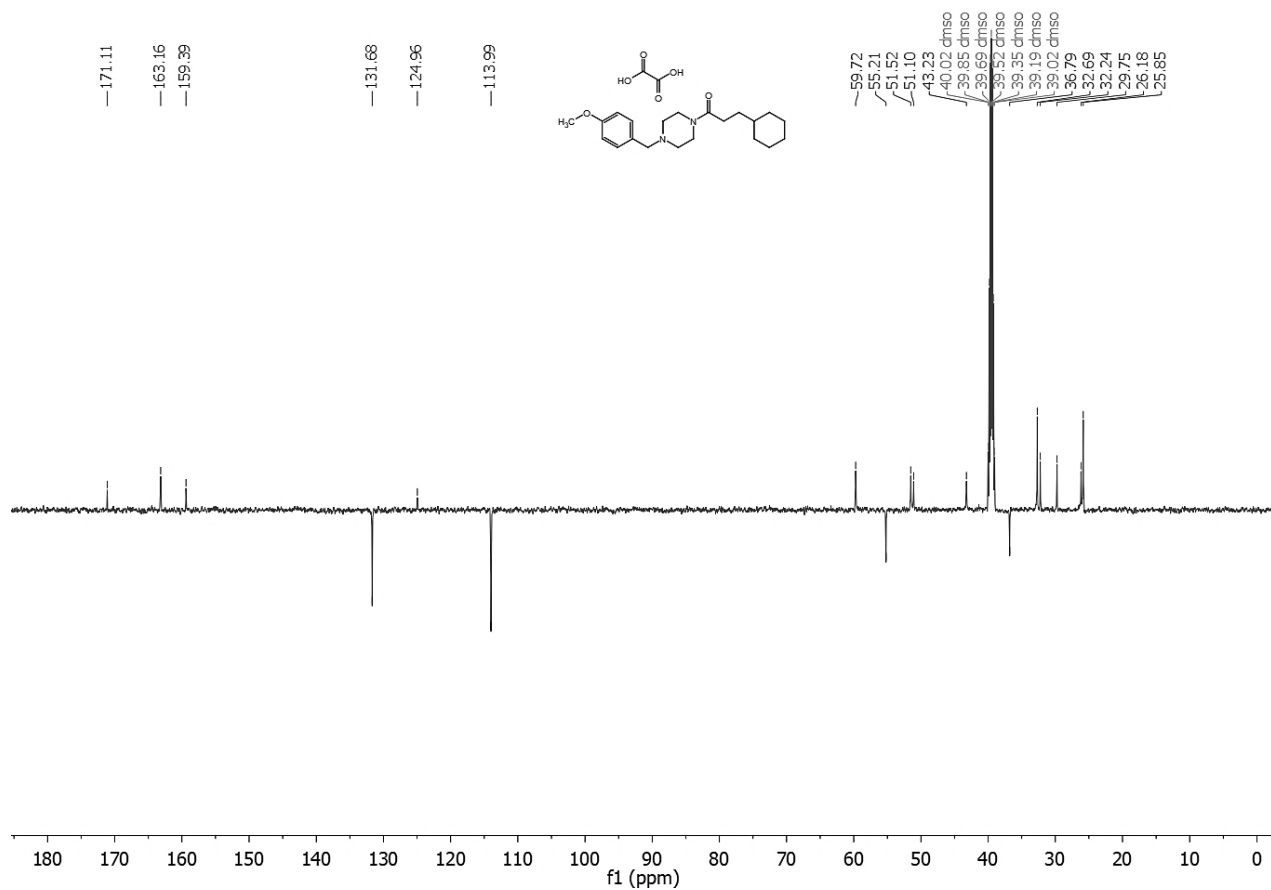

**Figure S7.**  $^{13}\text{C}$  NMR spectrum of compound **15** (oxalate salt).

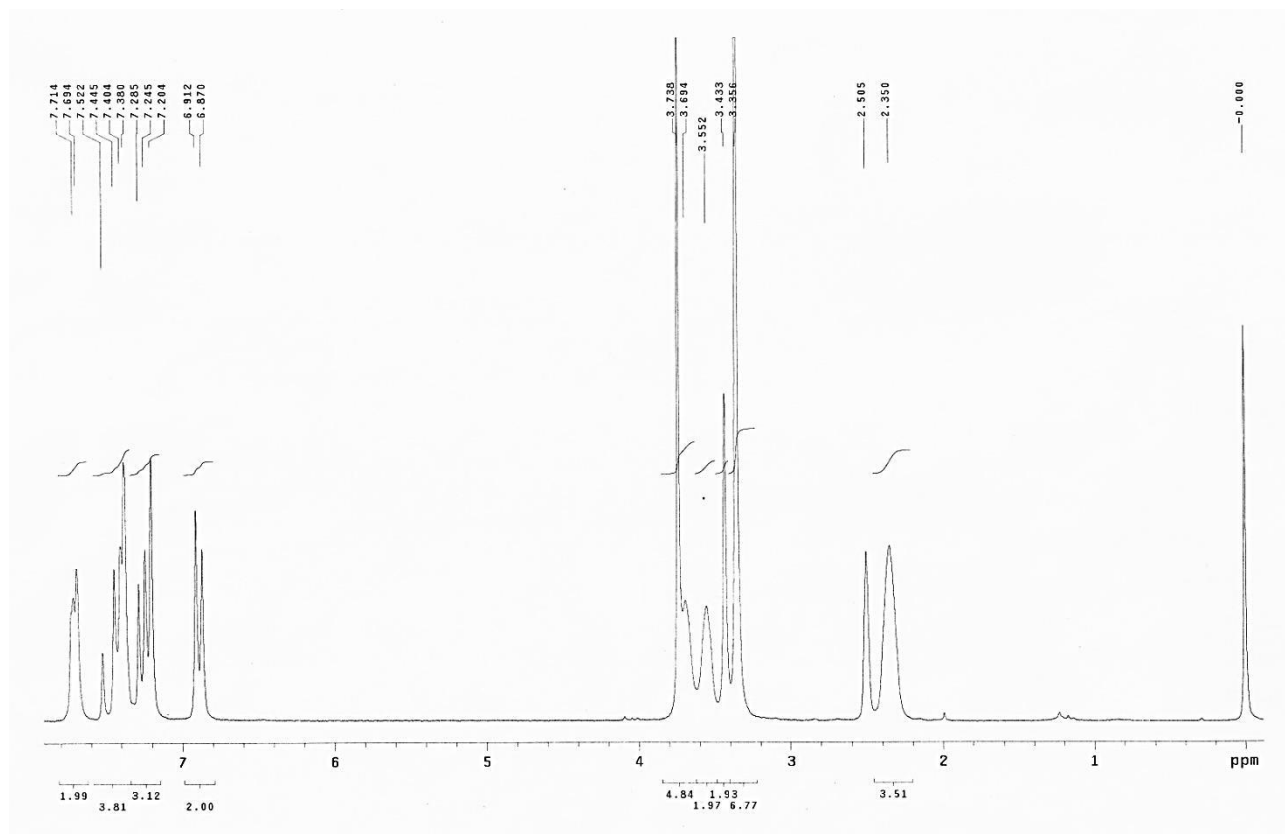

**Figure S8.**  $^1\text{H}$  NMR spectrum of compound **16**

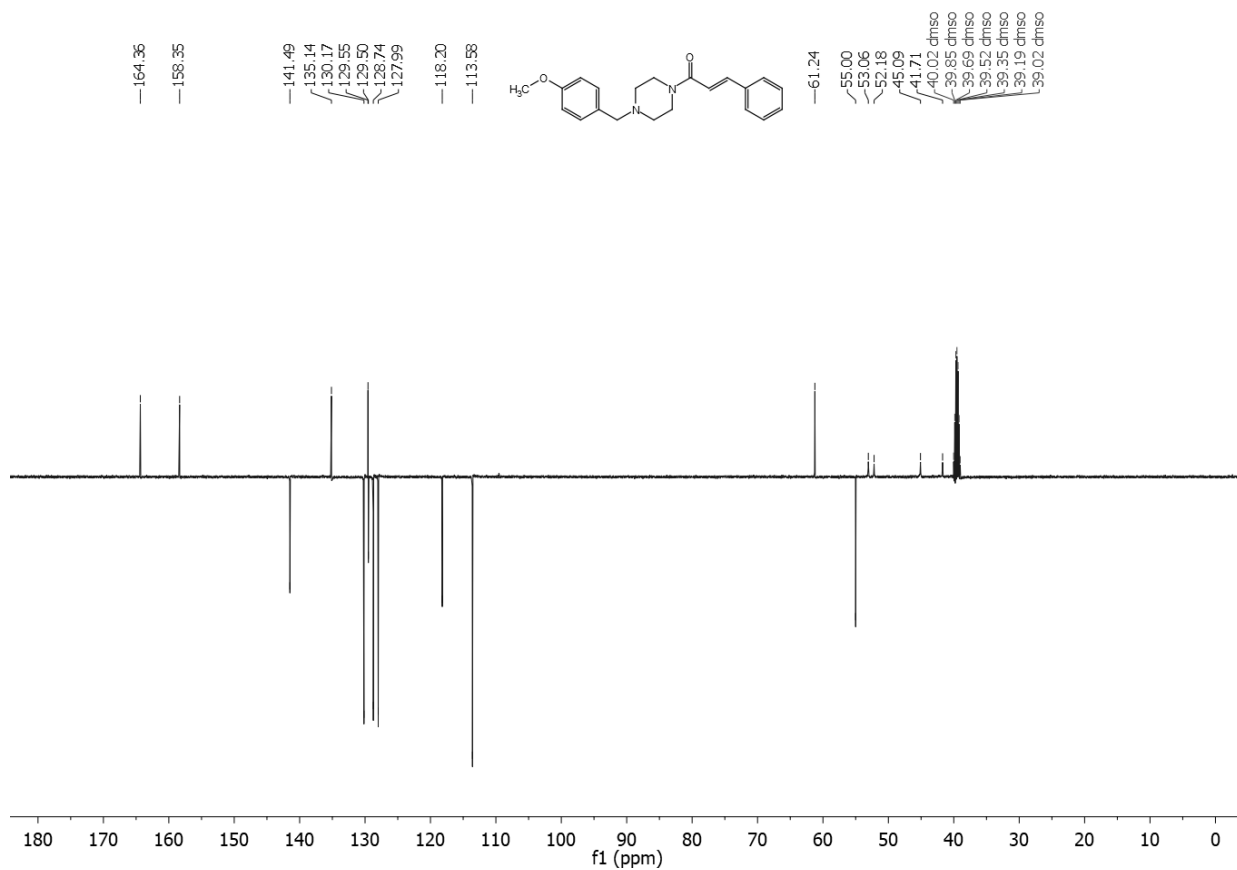

Figure S9. <sup>13</sup>C NMR spectrum of compound 16

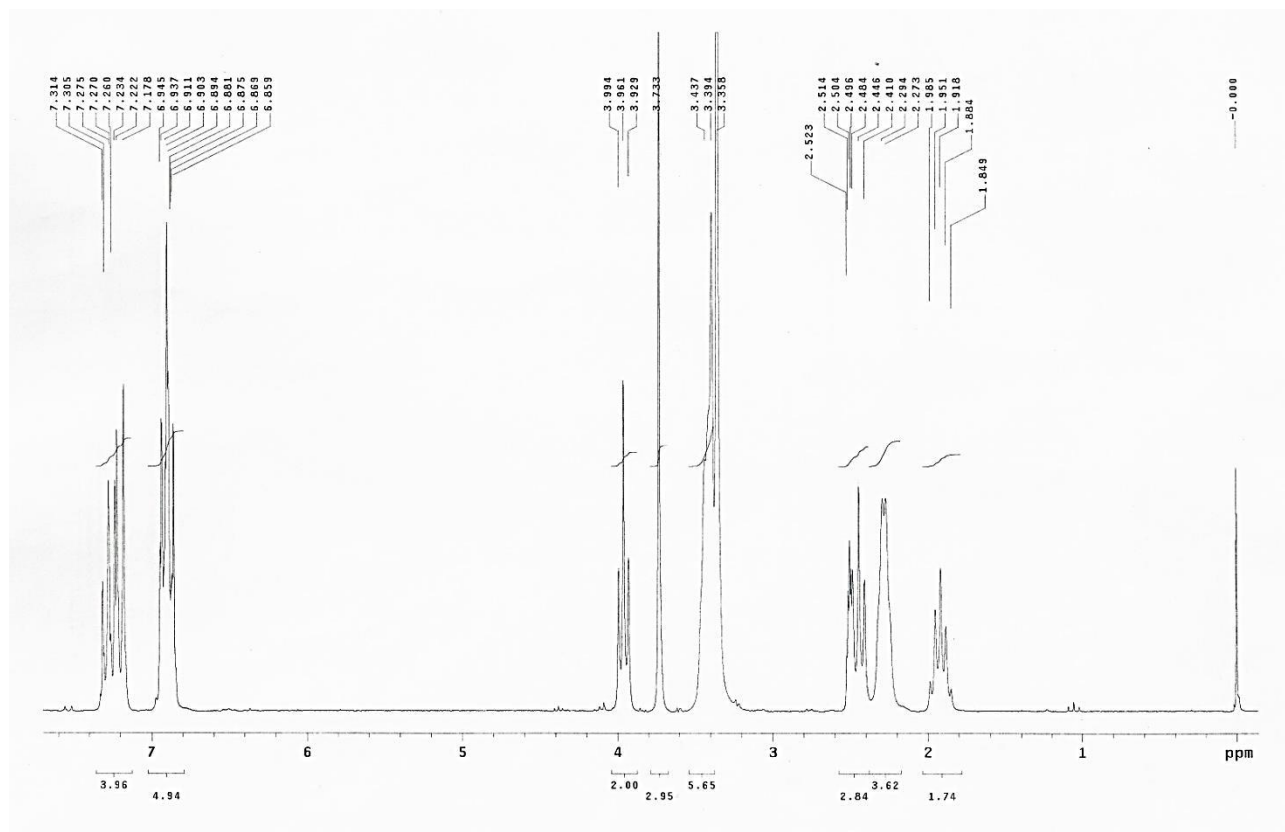

Figure S10. <sup>1</sup>H NMR spectrum of compound 20

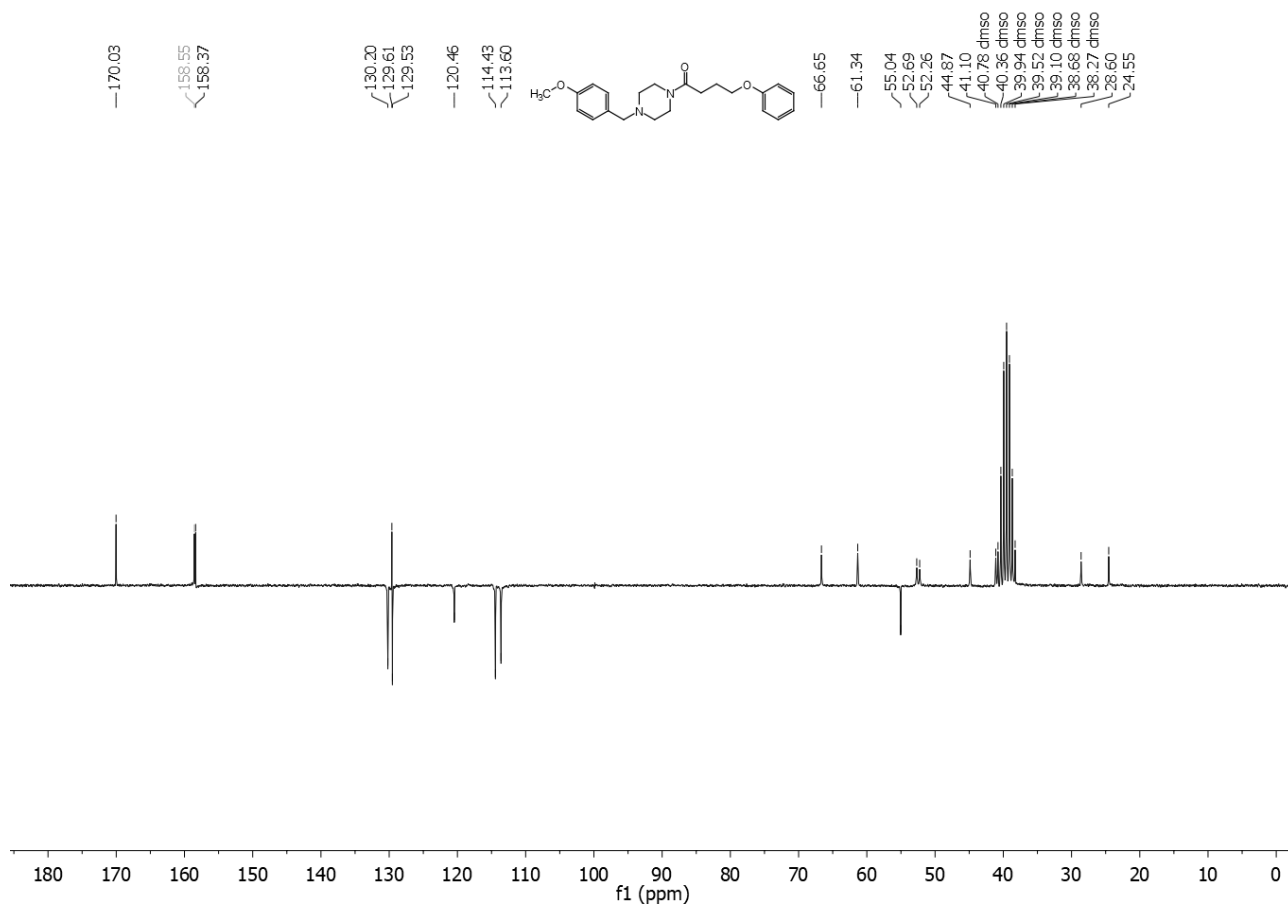

Figure S11. <sup>13</sup>C NMR spectrum of compound 20

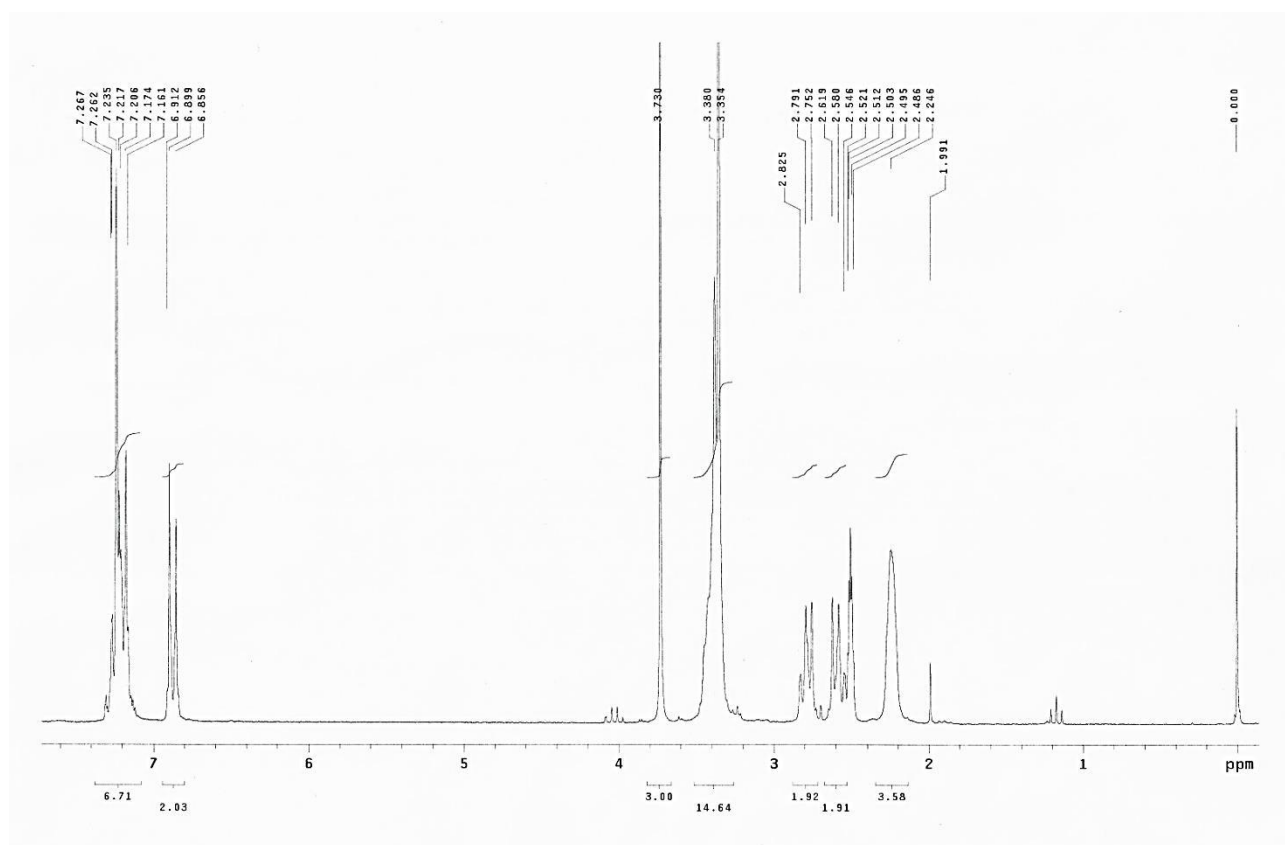

Figure S12. <sup>1</sup>H NMR spectrum of compound 21

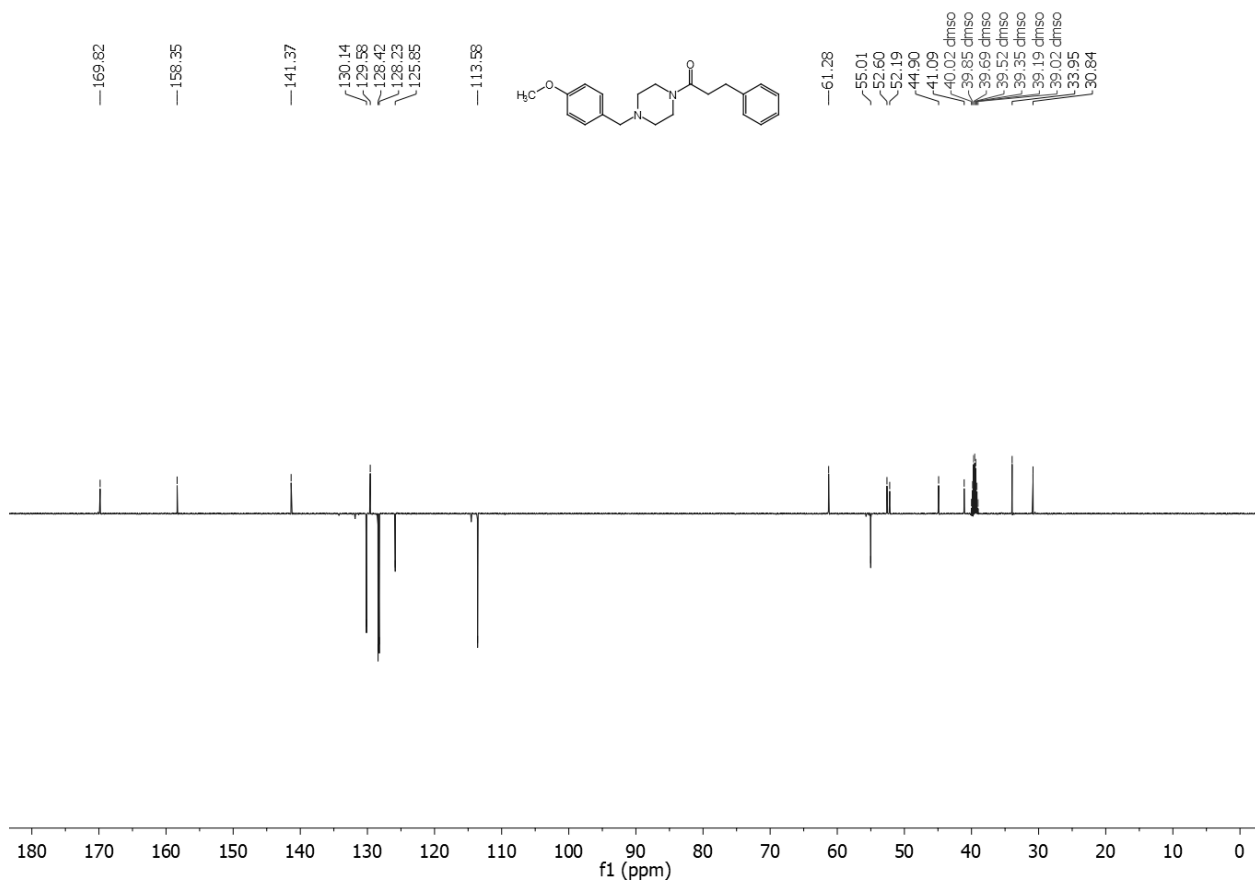

Figure S13.  $^{13}\text{C}$  NMR spectrum of compound 21

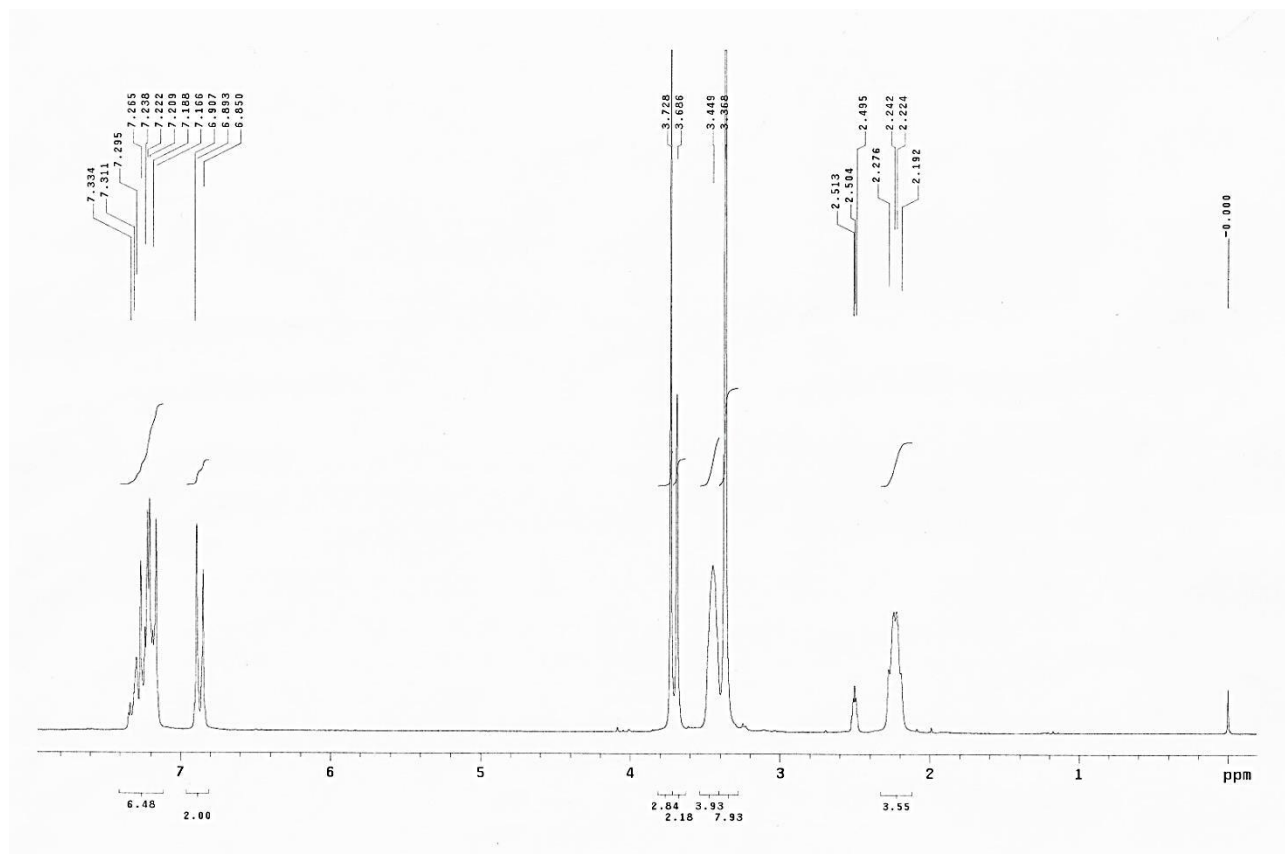

Figure S14.  $^1\text{H}$  NMR spectrum of compound 22



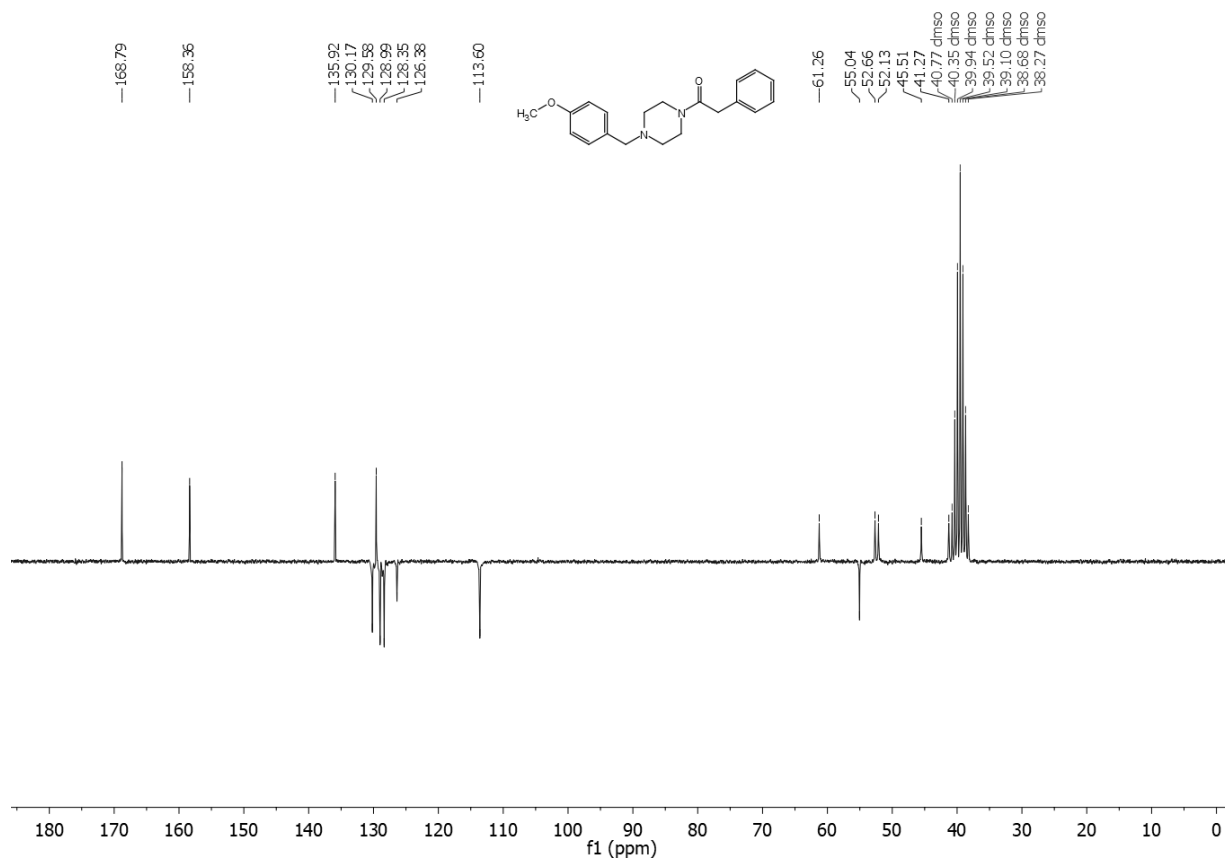

Figure S15. <sup>13</sup>C NMR spectrum of compound 22

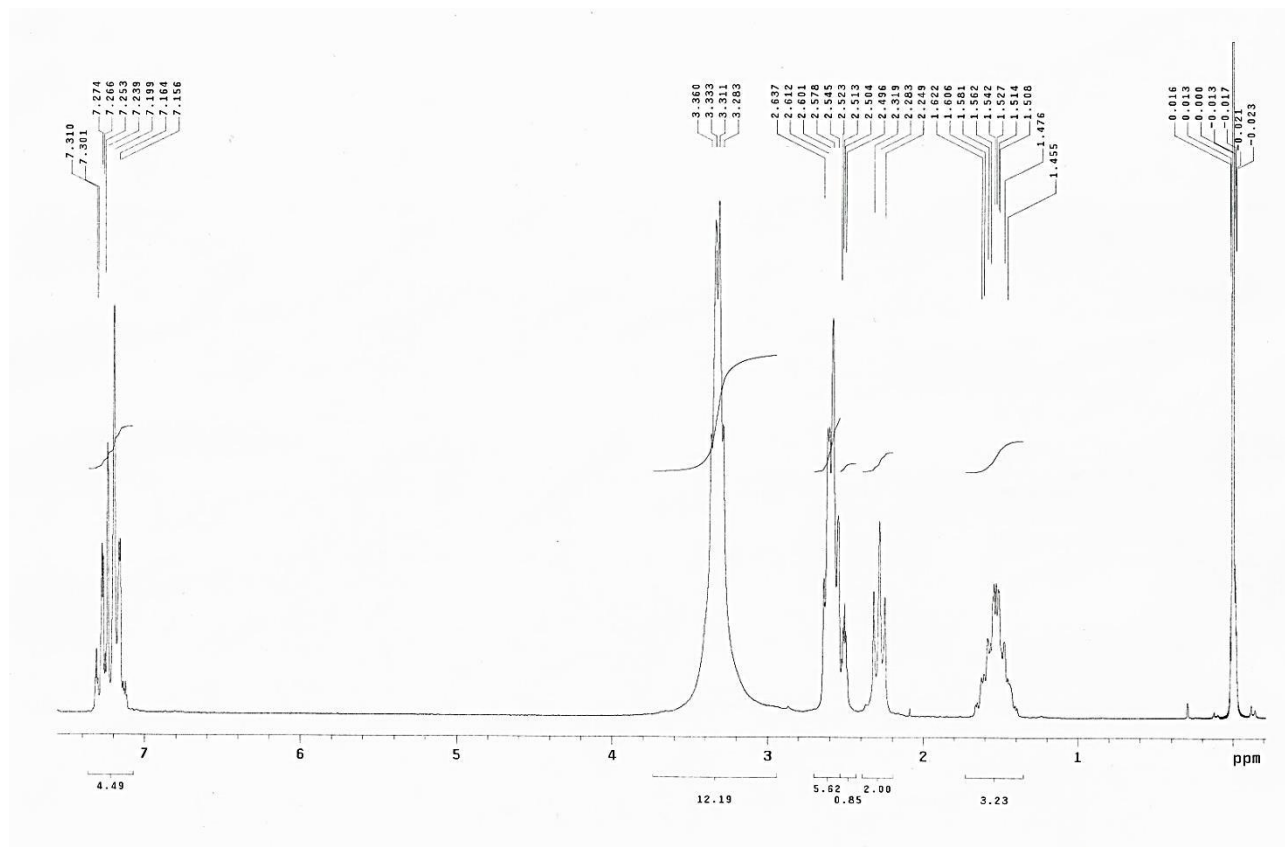

Figure S16. <sup>1</sup>H NMR spectrum of compound 23

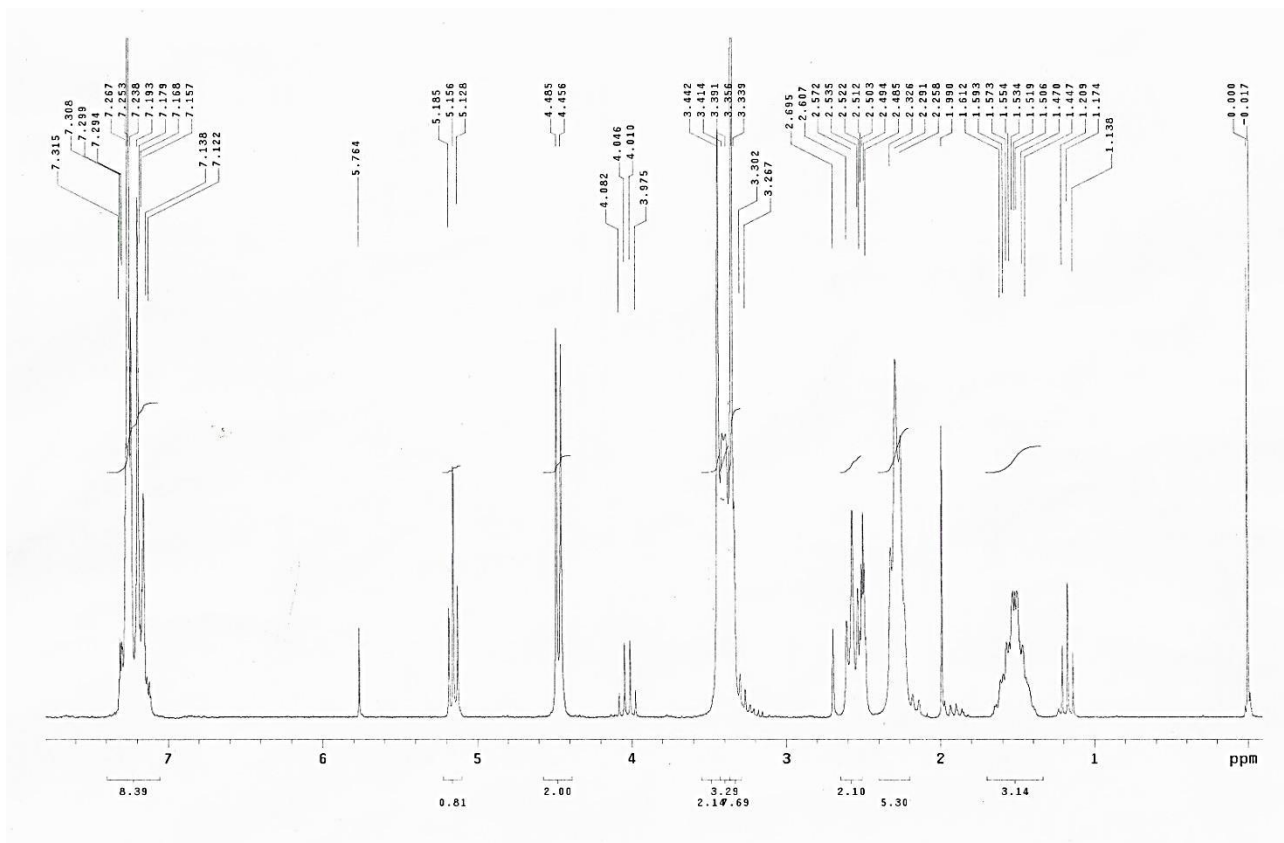

Figure S17.  $^1\text{H}$  NMR spectrum of compound 24

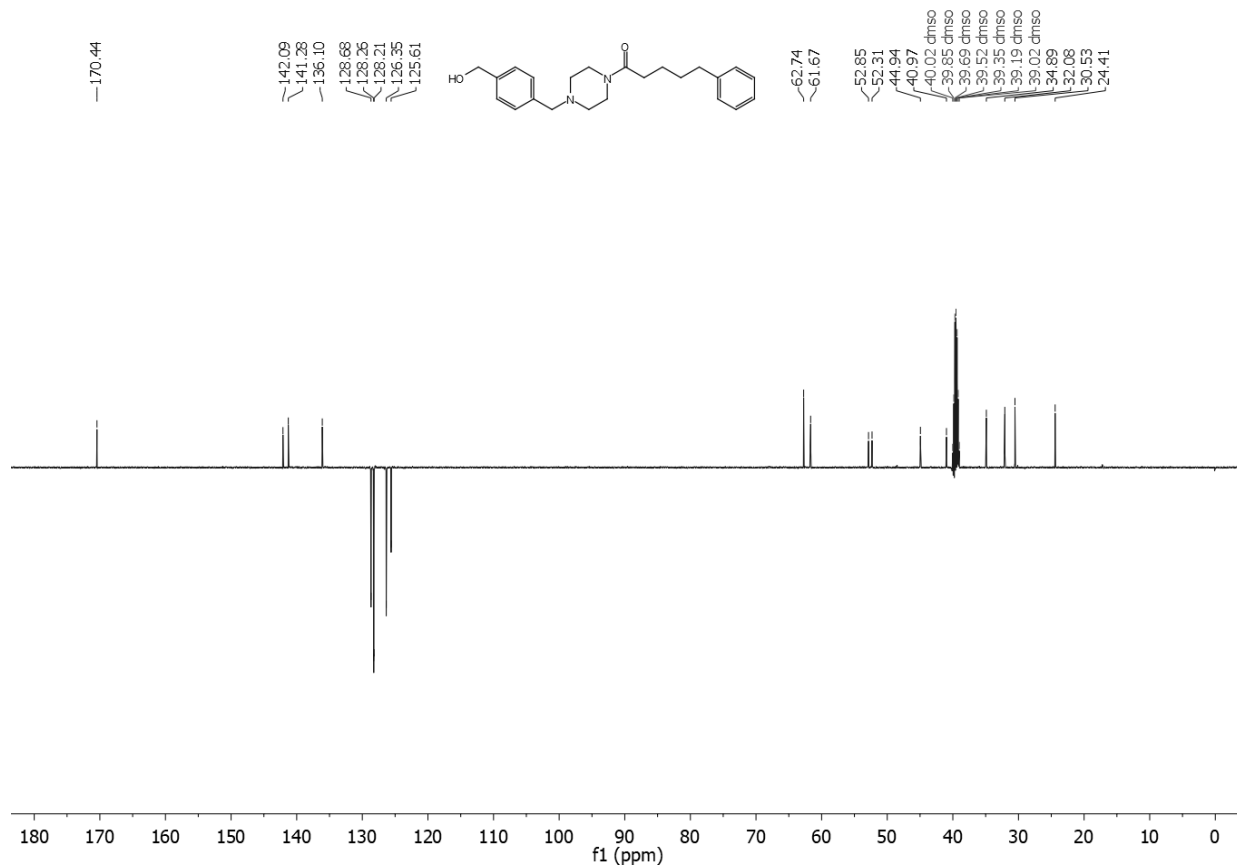

Figure S18.  $^{13}\text{C}$  NMR spectrum of compound 24
